# Supplementary material
Source: publisher figshare collection journal article supplement (https://acs.figshare.com/ndownloader/files/5185618)
Supplement: Supplementary file 1 [file 5185618]

## Supporting Information:

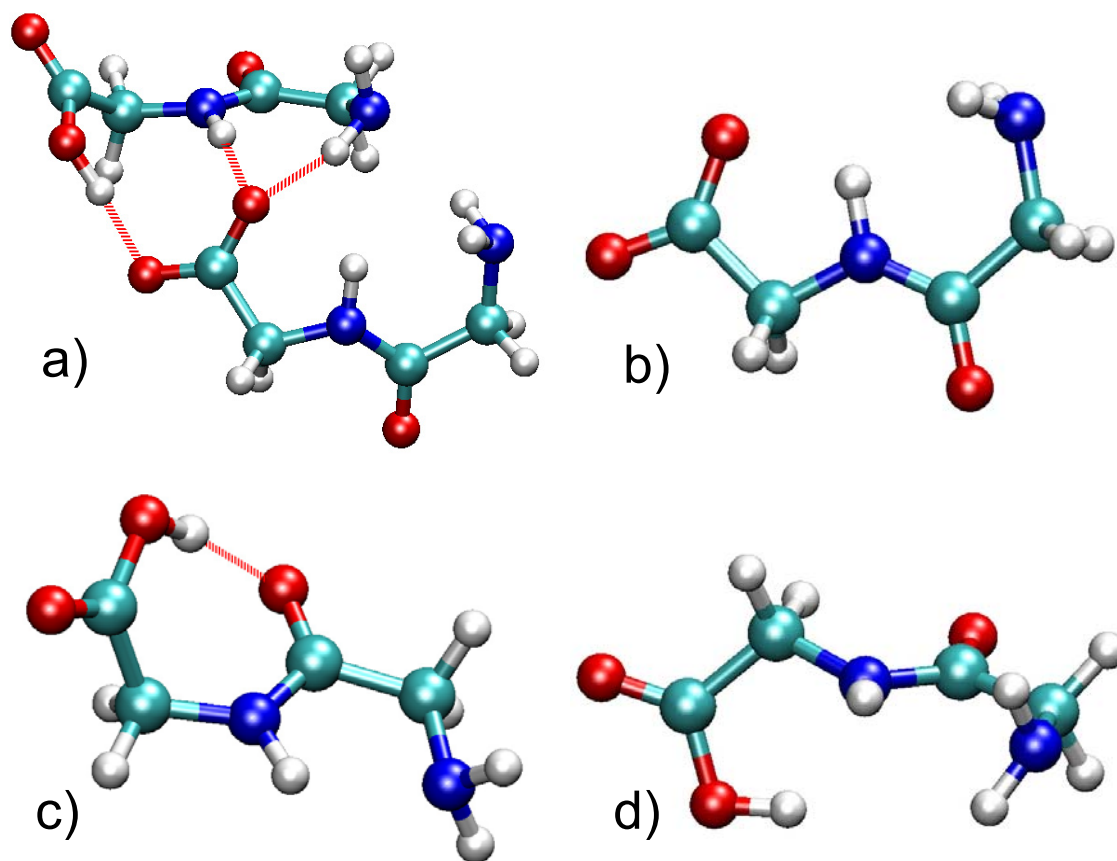

**Figure S1.** Optimized DFT structures for (a) deprotonated diglycine dimer  $[\text{GG-H}]^{\cdot-} \cdot (\text{GG})$  (lowest-energy structure), (b) deprotonated diglycine monomer  $[\text{GG-H}]^{\cdot-}$  (lowest-energy structure), (c) neutral diglycine monomer (lowest-energy, H-bonded structure), and (d) neutral diglycine monomer (open structure). Typical hydrogen bonds ( $< 3.0 \text{ \AA}$ ,  $180^\circ \pm 25^\circ$ ) are indicated as red dashed lines, loose "hydrogen-bond-like" interactions<sup>48</sup> ( $< 3.5 \text{ \AA}$ ,  $180^\circ \pm 50^\circ$ ) as blue dotted lines. The white balls are H, the green C, the red O and the blue N. Graphics generated using VMD.<sup>49</sup>

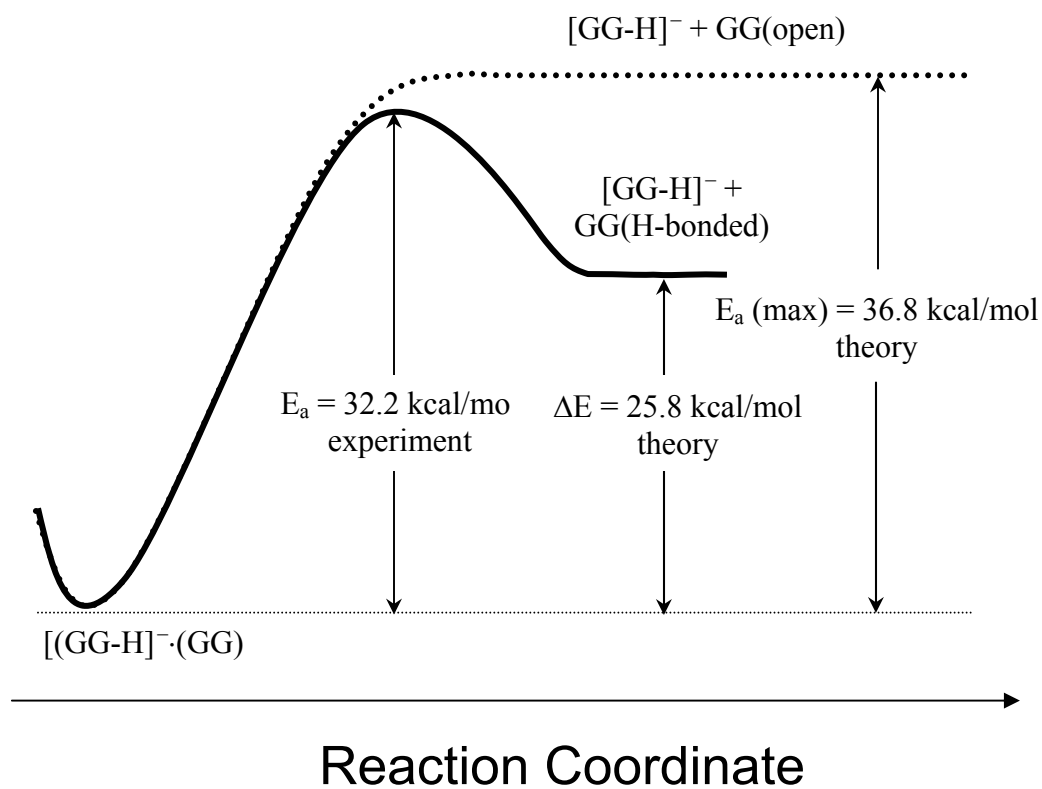

**Figure S2.** Schematic reaction coordinate diagram for deprotonated diglycine dimer dissociation,  $[\text{GG-H}]^{\bullet-} \cdot (\text{GG}) \rightarrow [\text{GG-H}]^- + \text{GG}$ , illustrating the experimental activation energy and the DFT dissociation energy (solid line). The dashed line represents dissociation to  $[\text{GG-H}]^-$  and the open form of GG.
